# Supplementary material for: Assessing the Effect of Fe3O4 Nanoparticles on the Thermomechanical Performance of Different Forms of Carbon Allotropes/Epoxy Hybrid Nanocomposites
Source: MDPI journal article supplement (doi:10.3390/applmech3020033), 2022-05-06
Supplement: s1 [file s1]

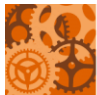

# Supplementary Materials: Assessing the Effect of $\text{Fe}_3\text{O}_4$ Nanoparticles on the Thermomechanical Performance of Different Forms of Carbon Allotropes/Epoxy Hybrid Nanocomposites

Sotirios G. Stavropoulos, Aikaterini Sanida and Georgios C. Psarras \*

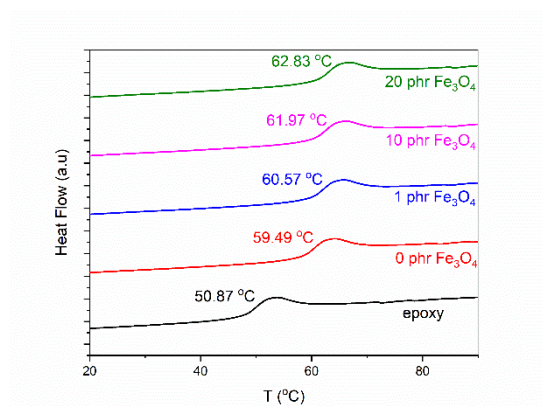

Figure S1. DSC Thermograms for the nanocomposites with 10phr  $\text{Fe}_3\text{O}_4$  content.

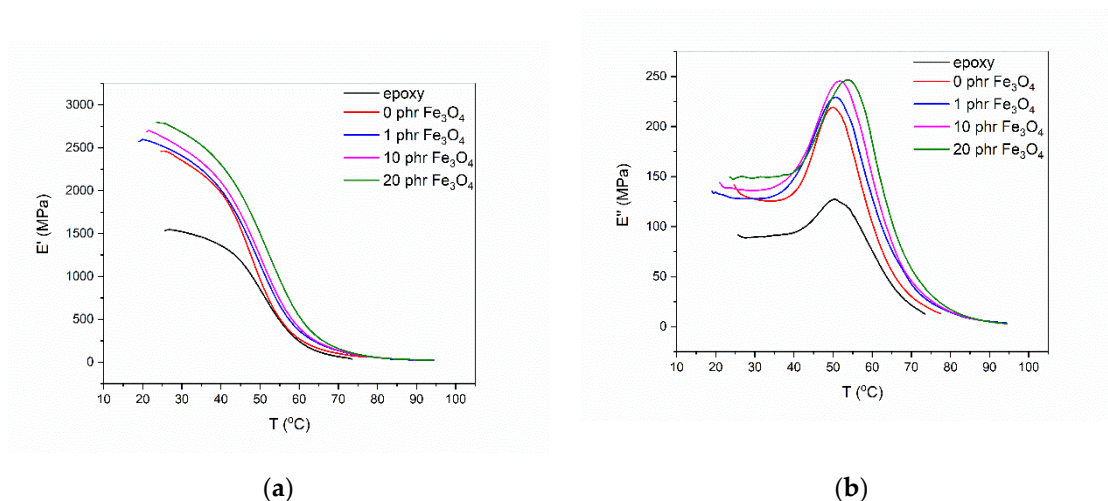

Figure S2. The variation of the (a) Storage and (b) loss modulus as a function of temperature for the nanocomposites with 3phr MWCNT content.

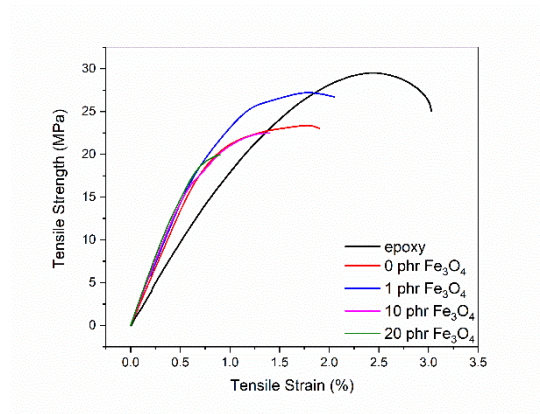

**Figure S3.** Tensile strength versus tensile strain for the systems with 3phr GnP content.
